# Supplementary material for: Potential public health impact of RTS,S malaria candidate vaccine in sub-Saharan Africa: a modelling study
Source: PubMed Central journal article supplement (PMC4690265; doi:10.1186/s12936-015-1046-z), 2015-12-23

Supplementary figure 2: Probability density functions of (A) the probability of asymptomatic infection (a1-a6) and (B) the risk of severe malaria (f1-f6)

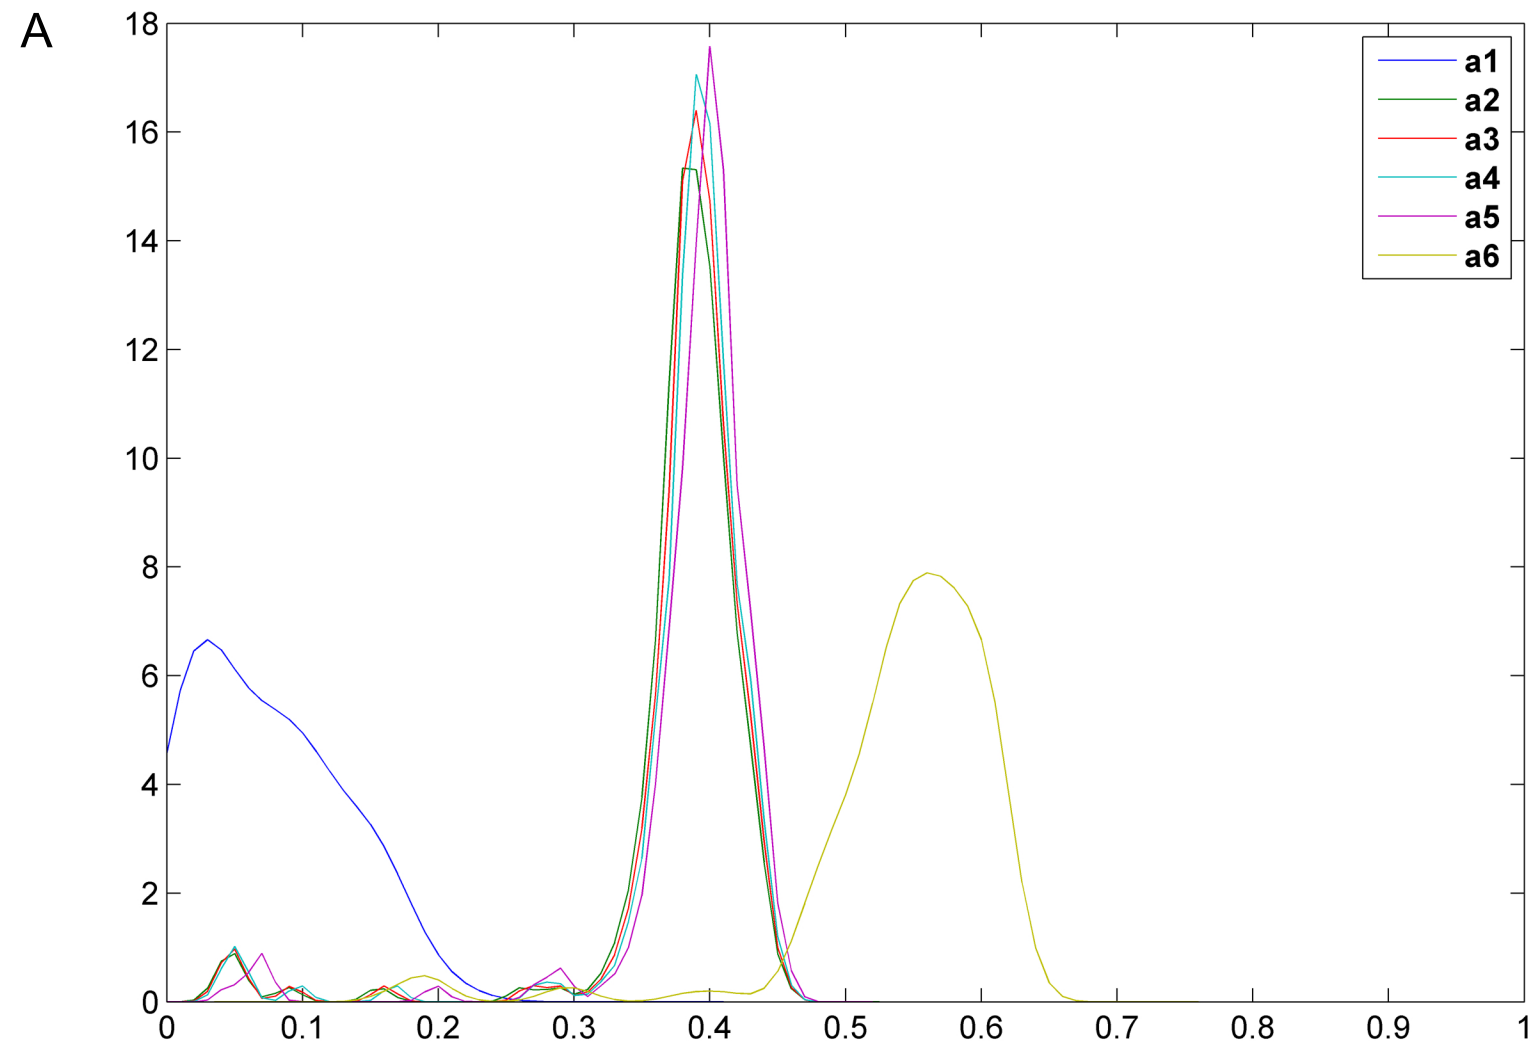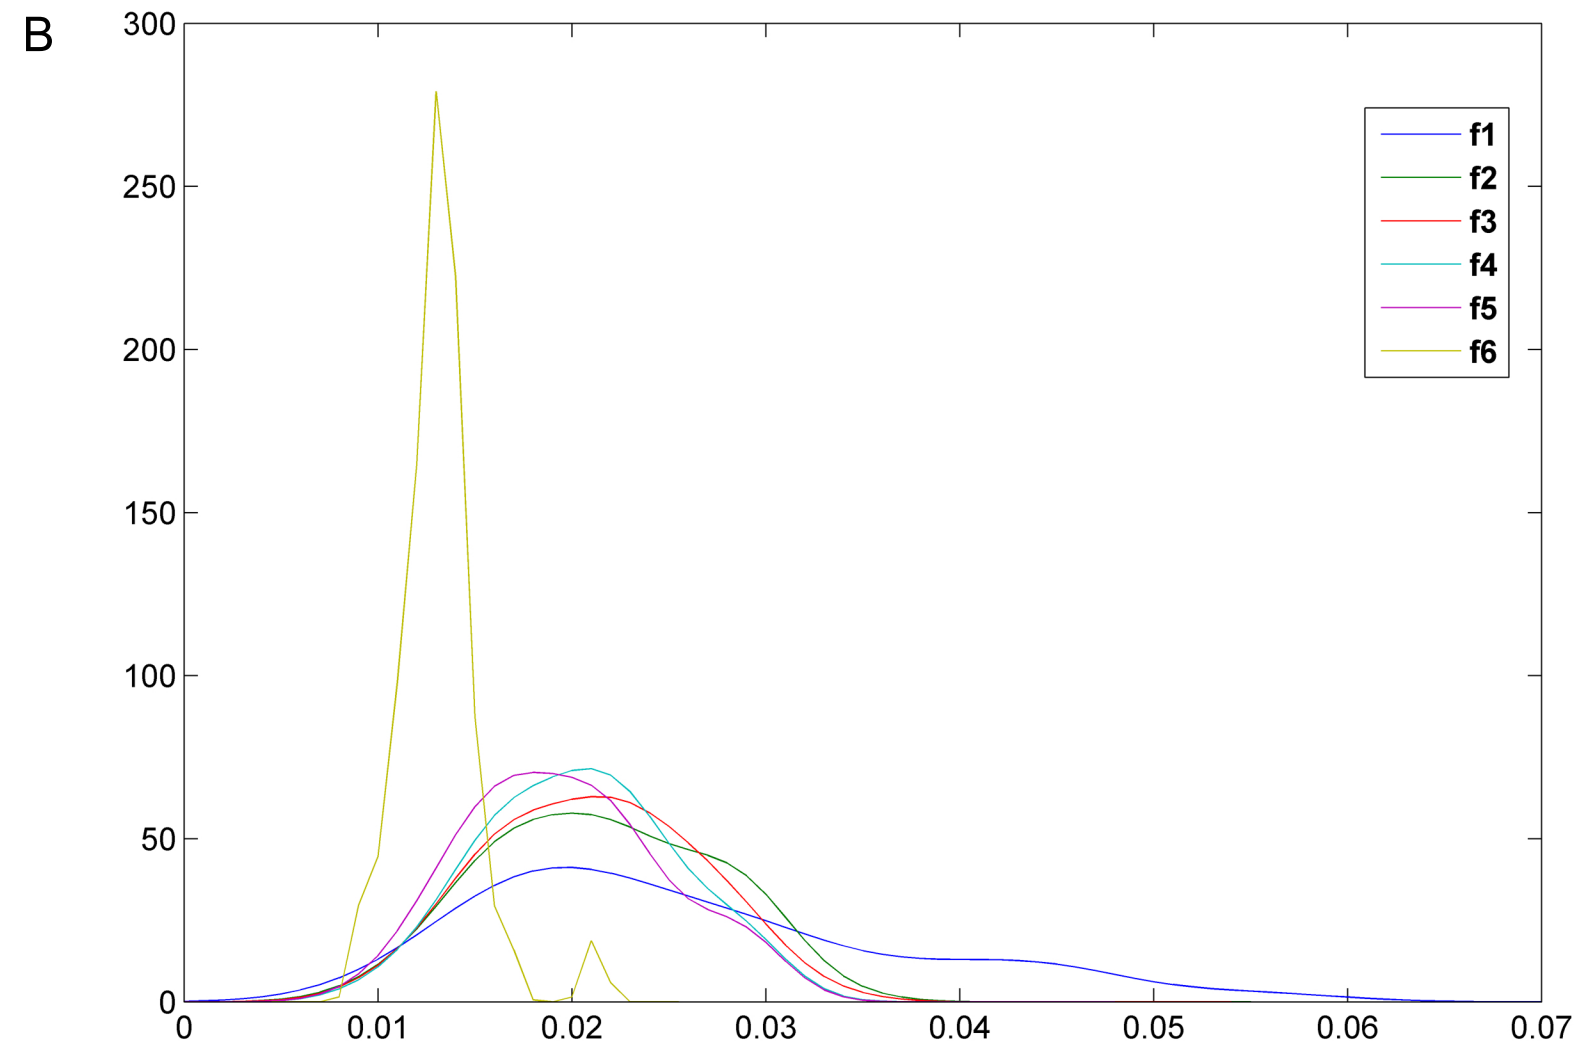

Supplement: 12936_2015_1046_MOESM2_ESM.pdf [file 12936_2015_1046_MOESM2_ESM.pdf]
