# Supplementary material for: Potential public health impact of RTS,S malaria candidate vaccine in sub-Saharan Africa: a modelling study
Source: Springer Nature journal article supplement (doi:10.1186/s12936-015-1046-z), 2015-12-01

Supplementary figure 1: Probability density functions of the risk of infection parameter ( $q$ )

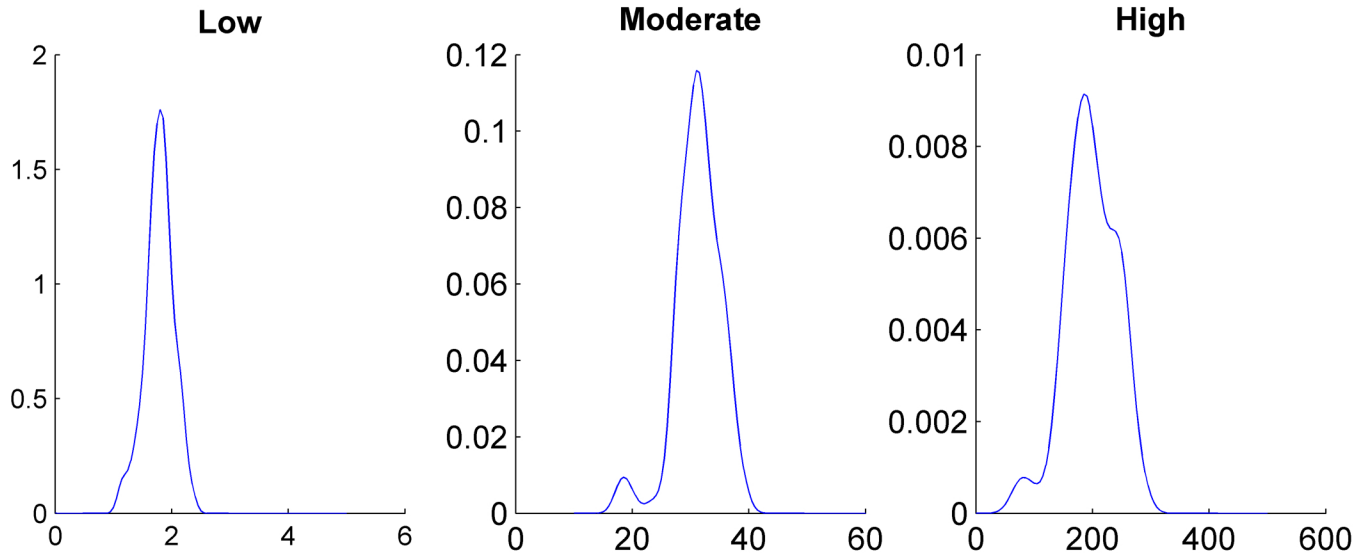

Supplement: MOESM1 [file 9761956]
